# Supplementary material
Source: JCI journal article supplement (doi:10.1172/jci198842)
Supplement: sd1 [file 1]

# CD36

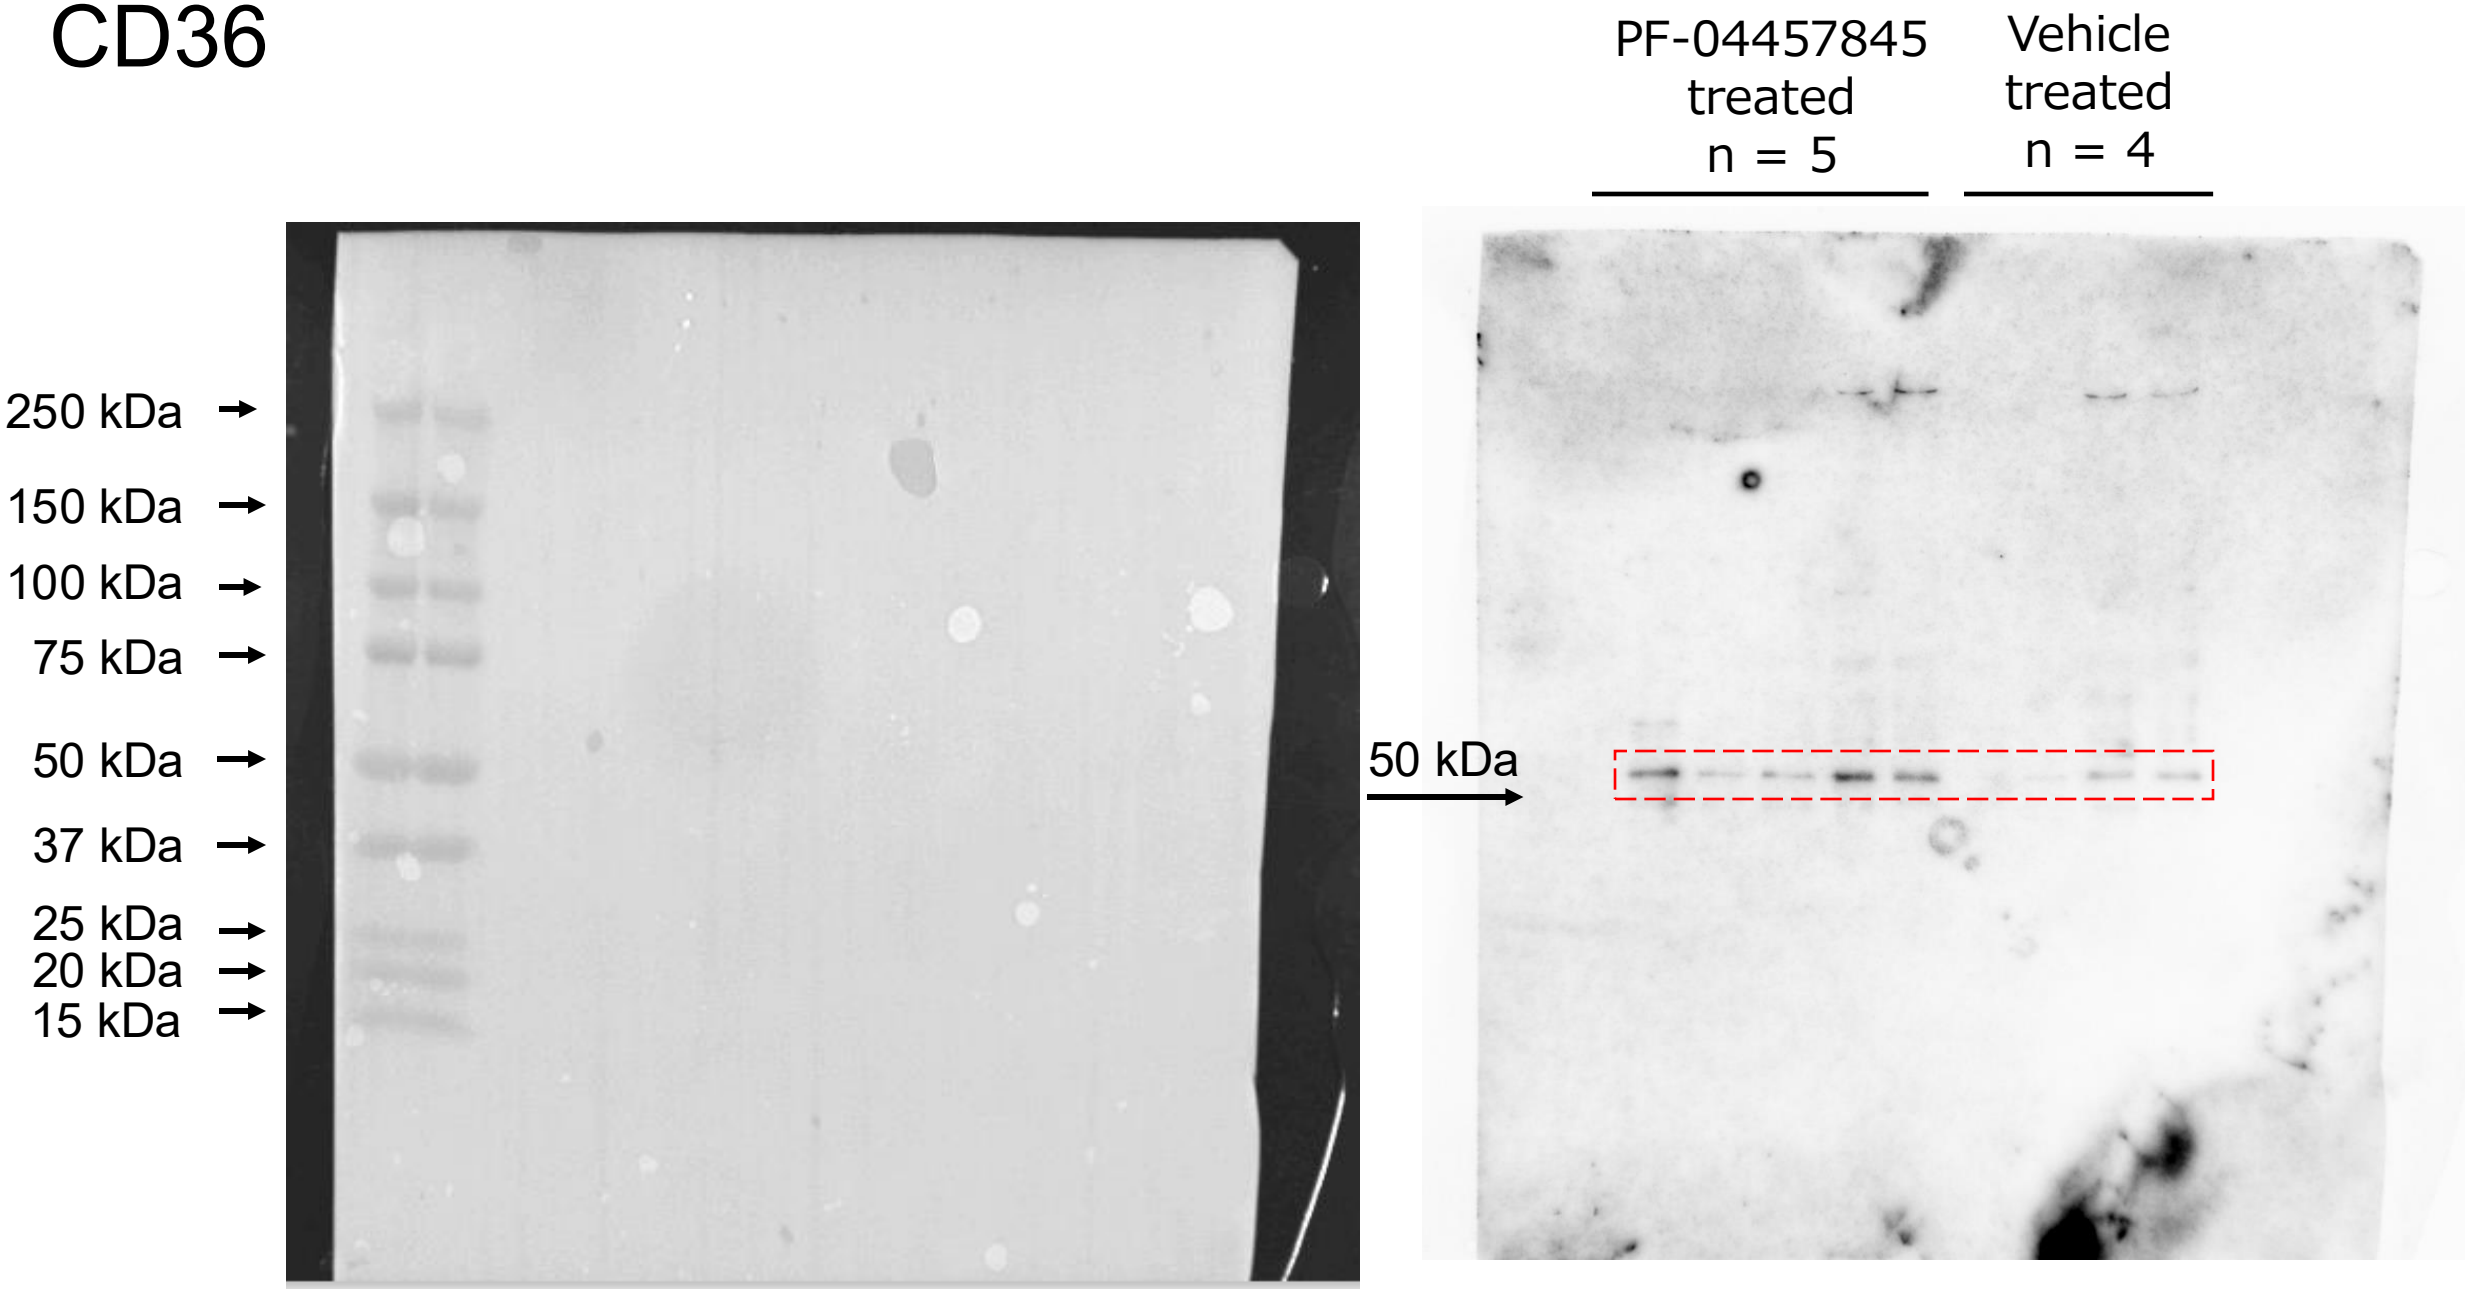

Full unedited membrane of CD36 for Figure 7D. The result is presented in reverse left to right in Figure 7D.

# SOD1

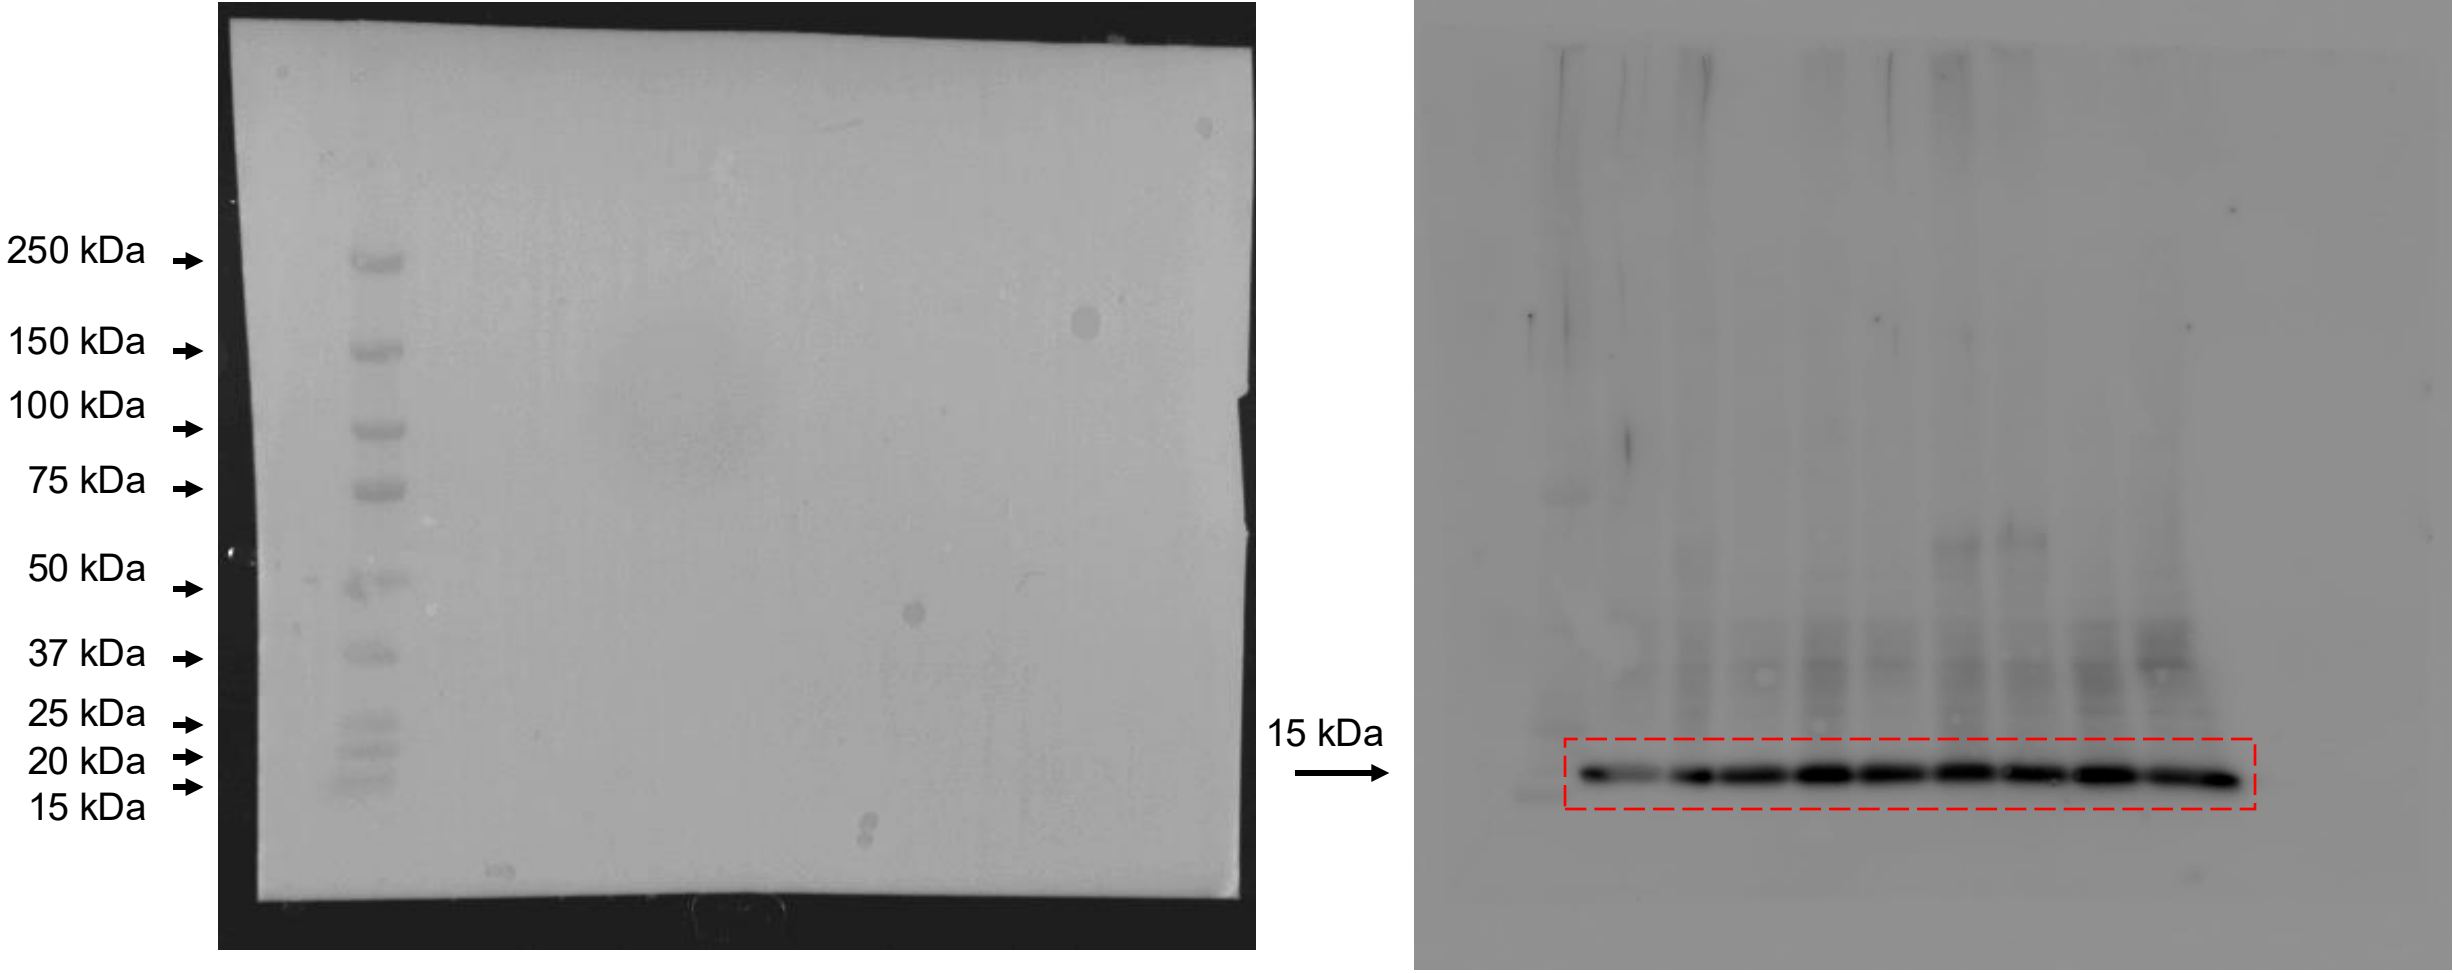

Full unedited membrane of SOD1 for Figure 7D. The result is presented in reverse left to right in Figure 7D.

# CD86

PF-04457845  
treated  
n = 5

Vehicle  
treated  
n = 4

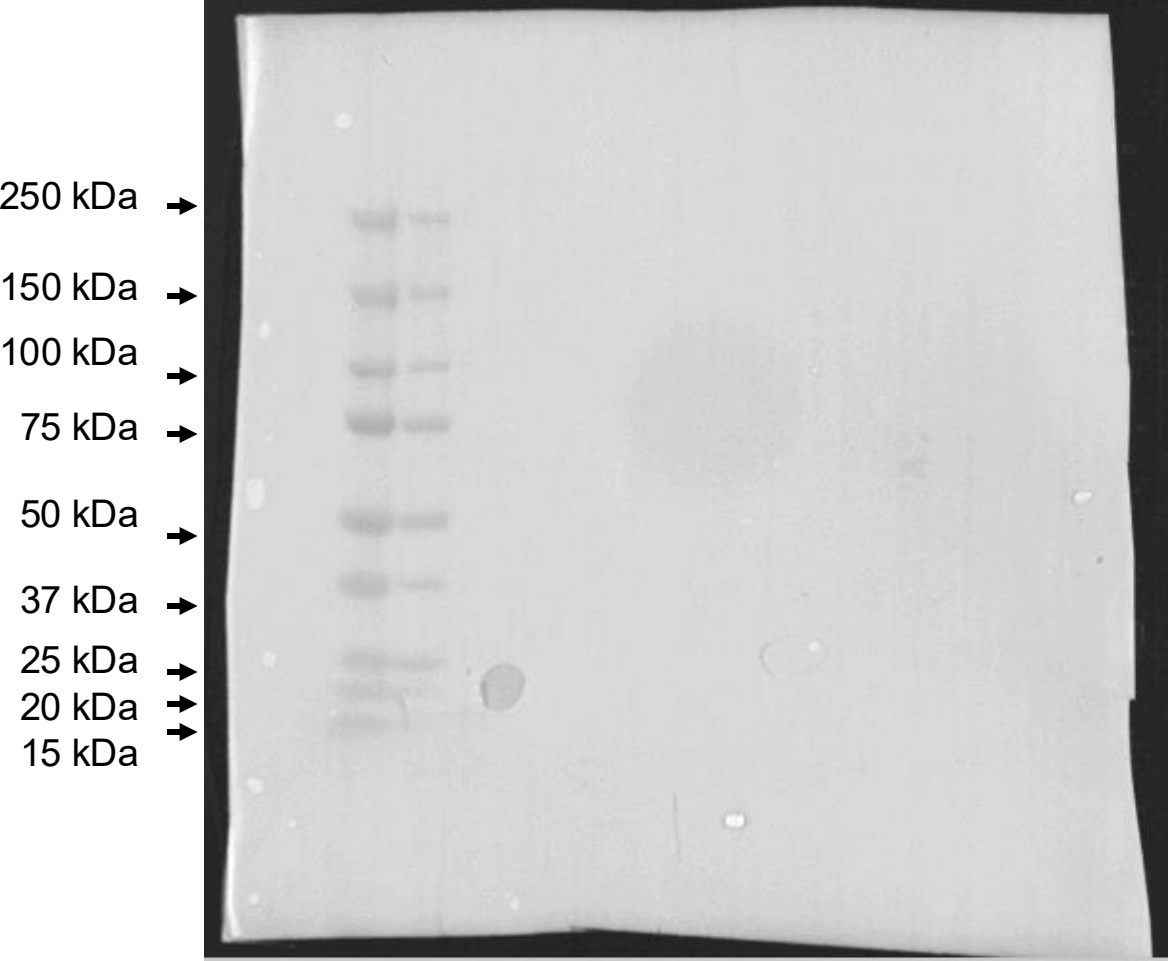

75 kDa →

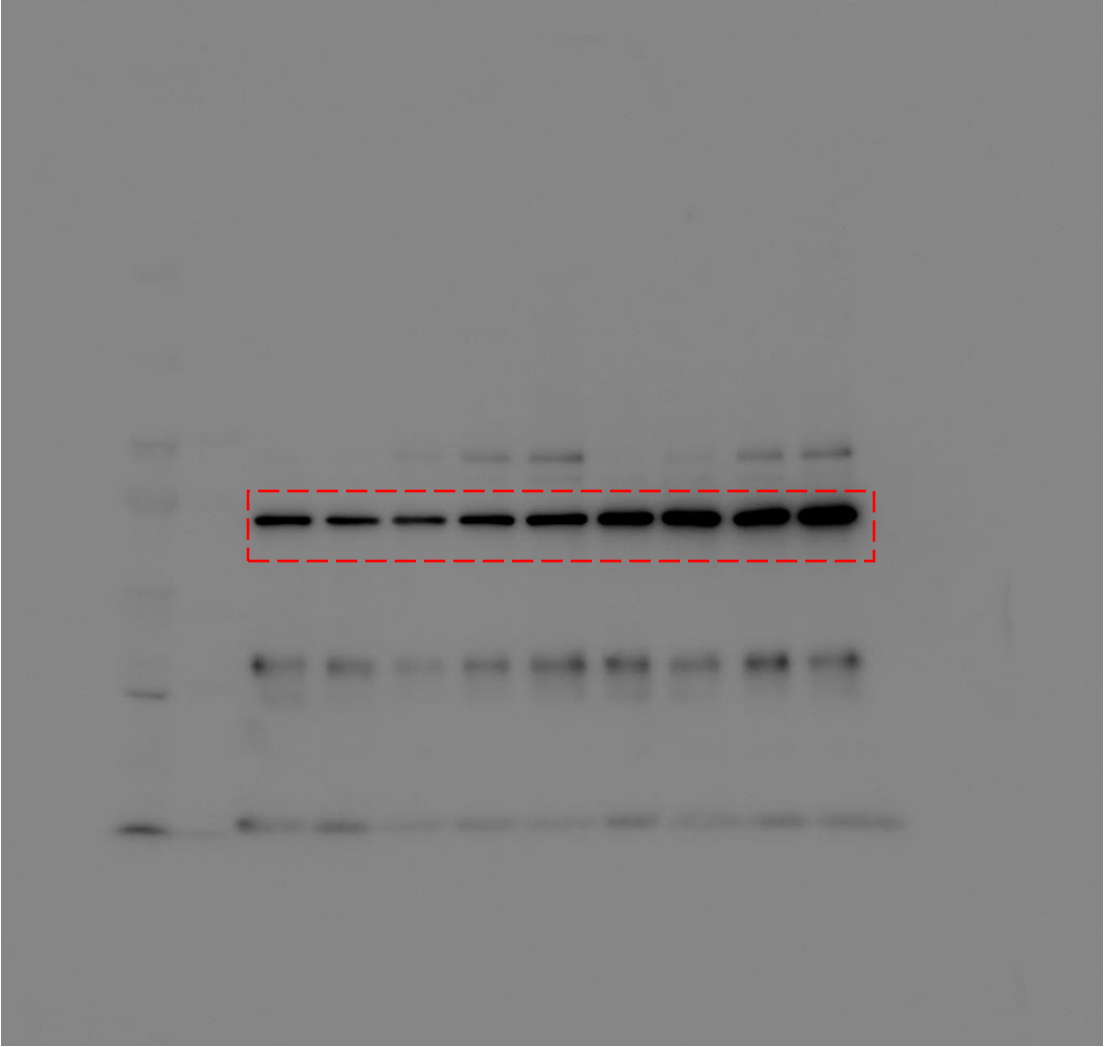

Full unedited membrane of CD86 for Figure 7D. The result is presented in reverse left to right in Figure 7D.

# IBA-1

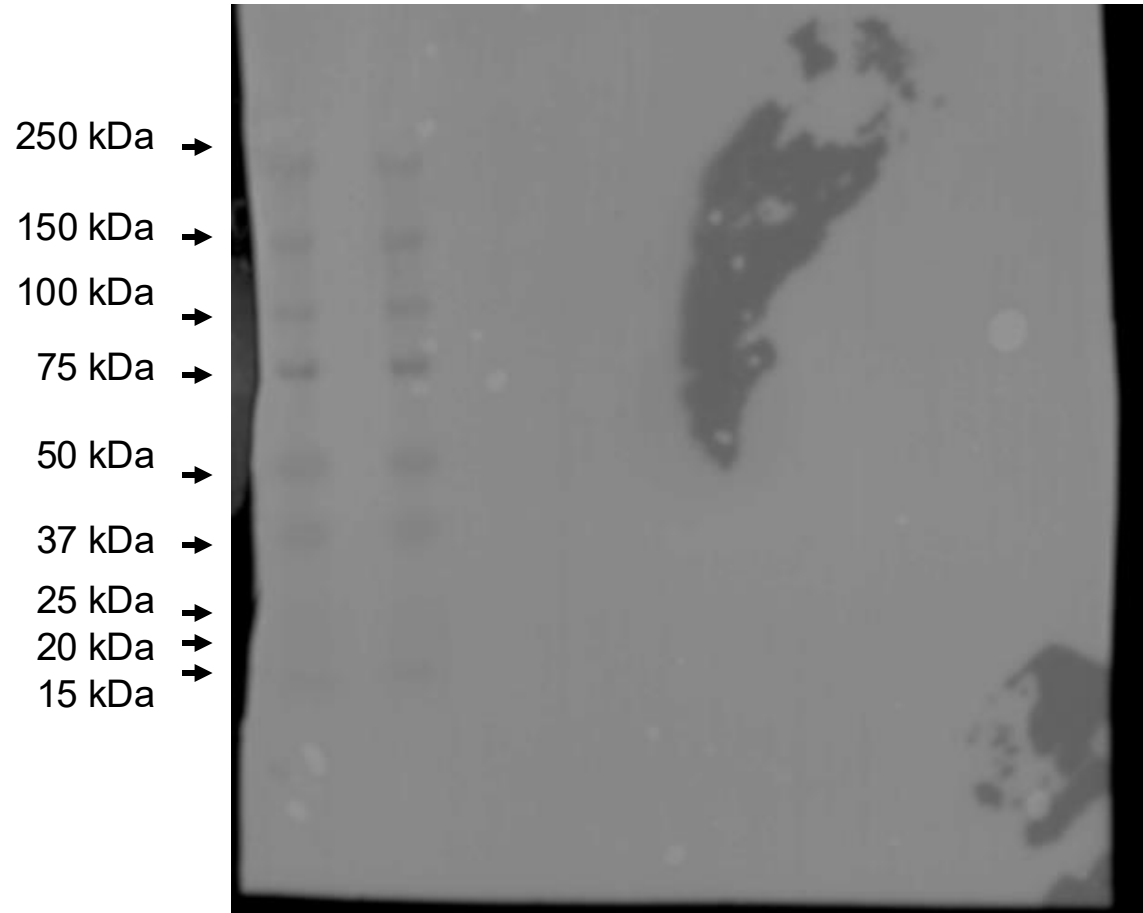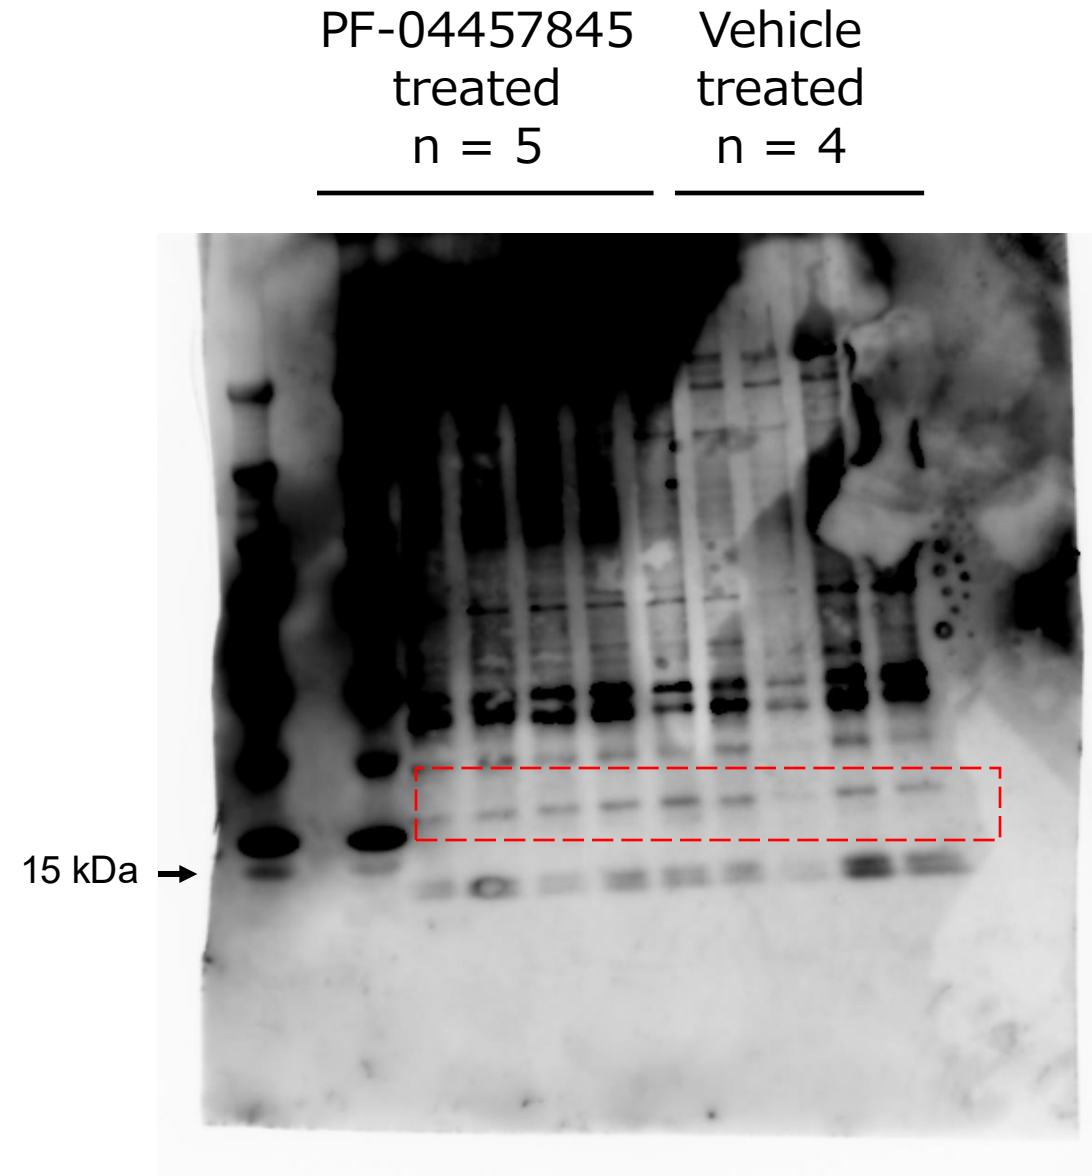

Full unedited membrane of IBA-1 for Figure 7D. The result is presented in reverse left to right in Figure 7D.

# ERK1/2

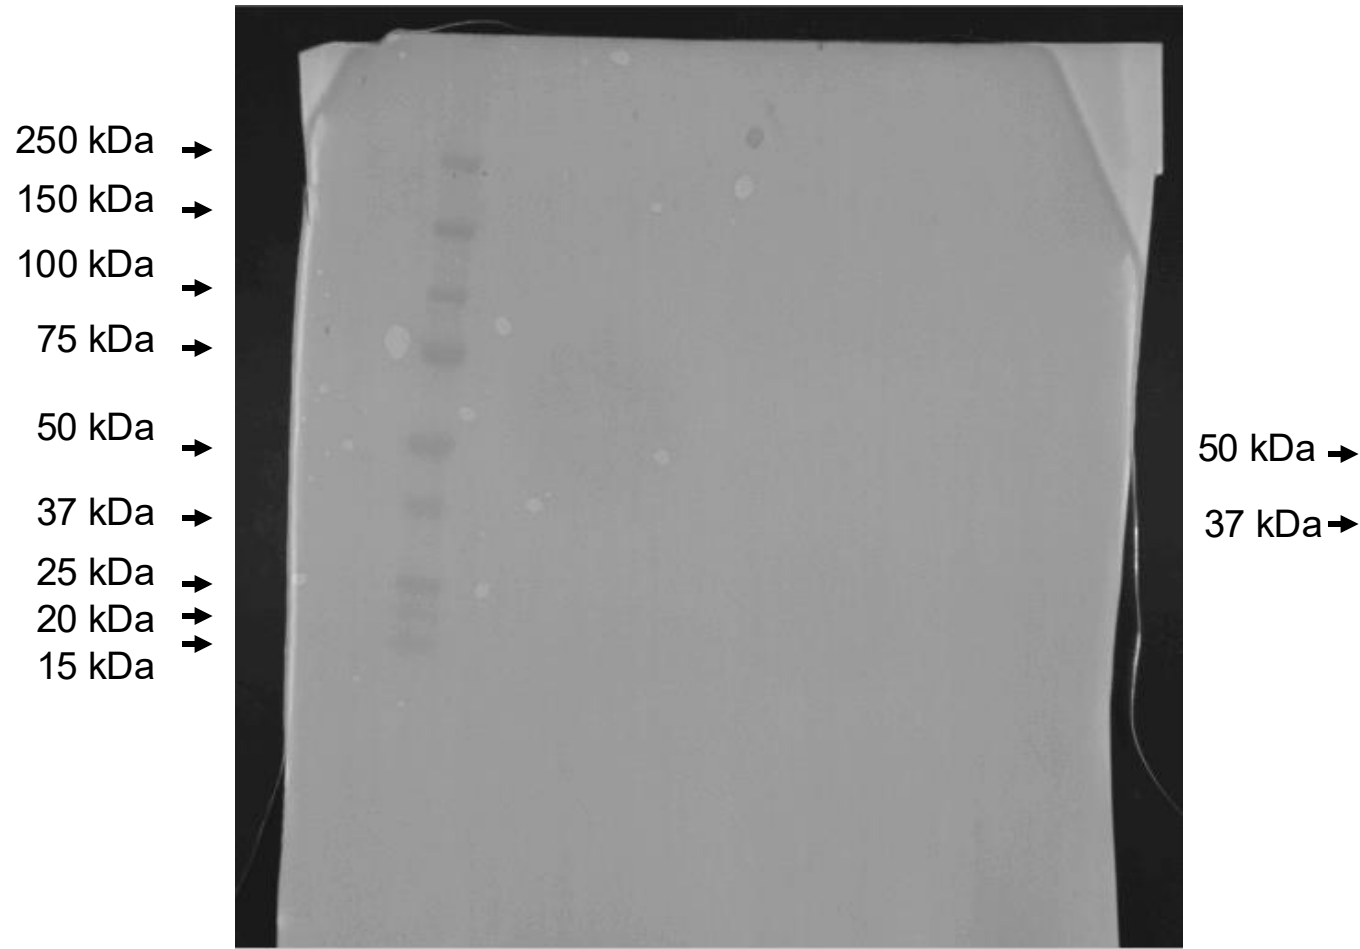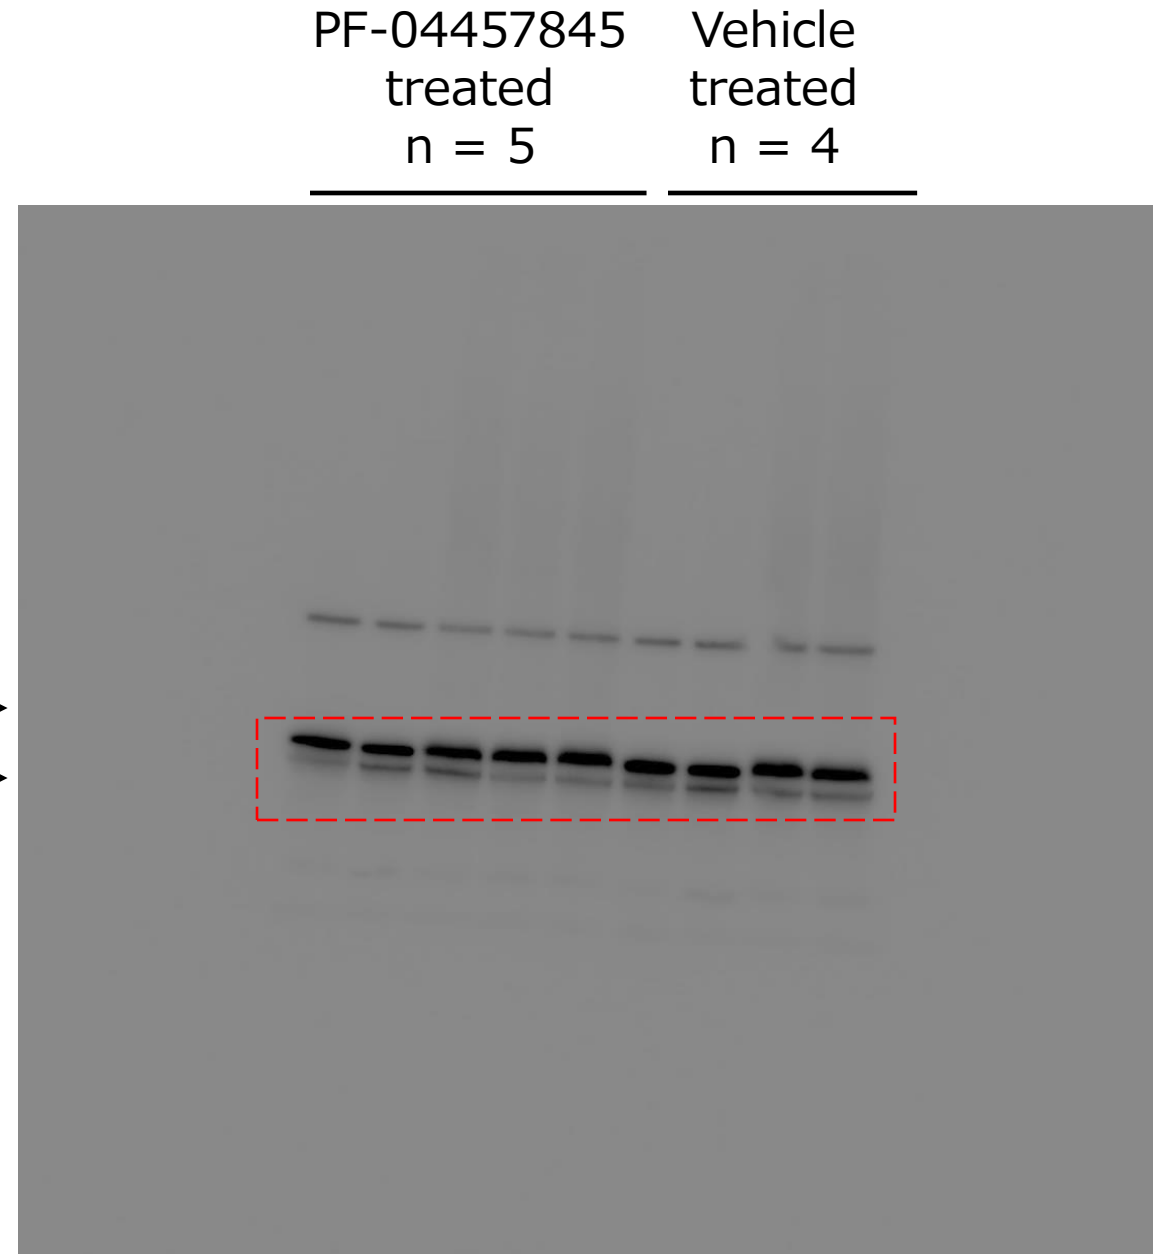

Full unedited membrane of ERK1/2 for Figure 7D. The result is presented in reverse left to right in Figure 7D.

pERK1/2

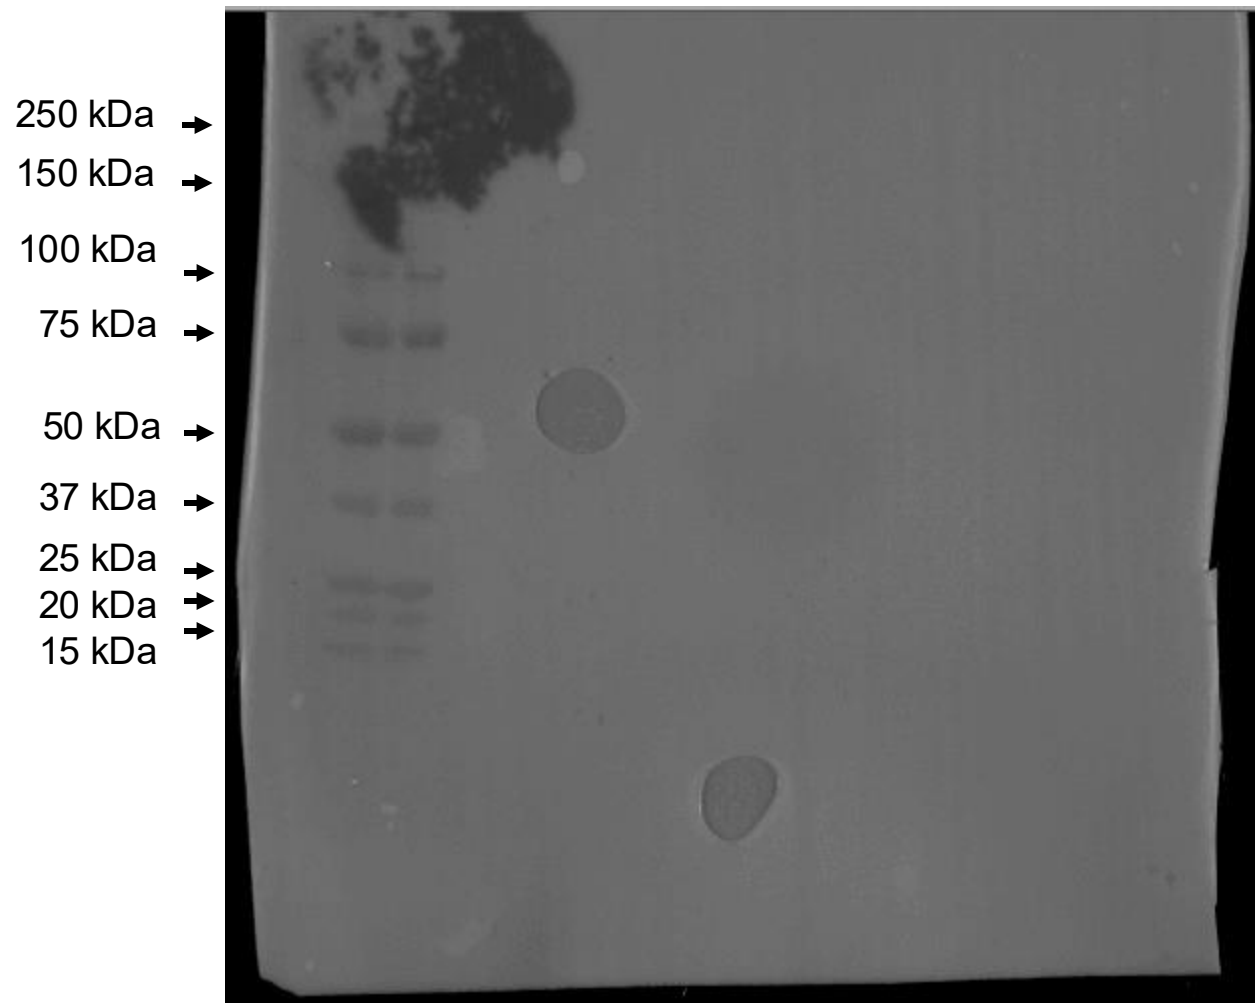

PF-04457845 treated n = 5      Vehicle treated n = 4

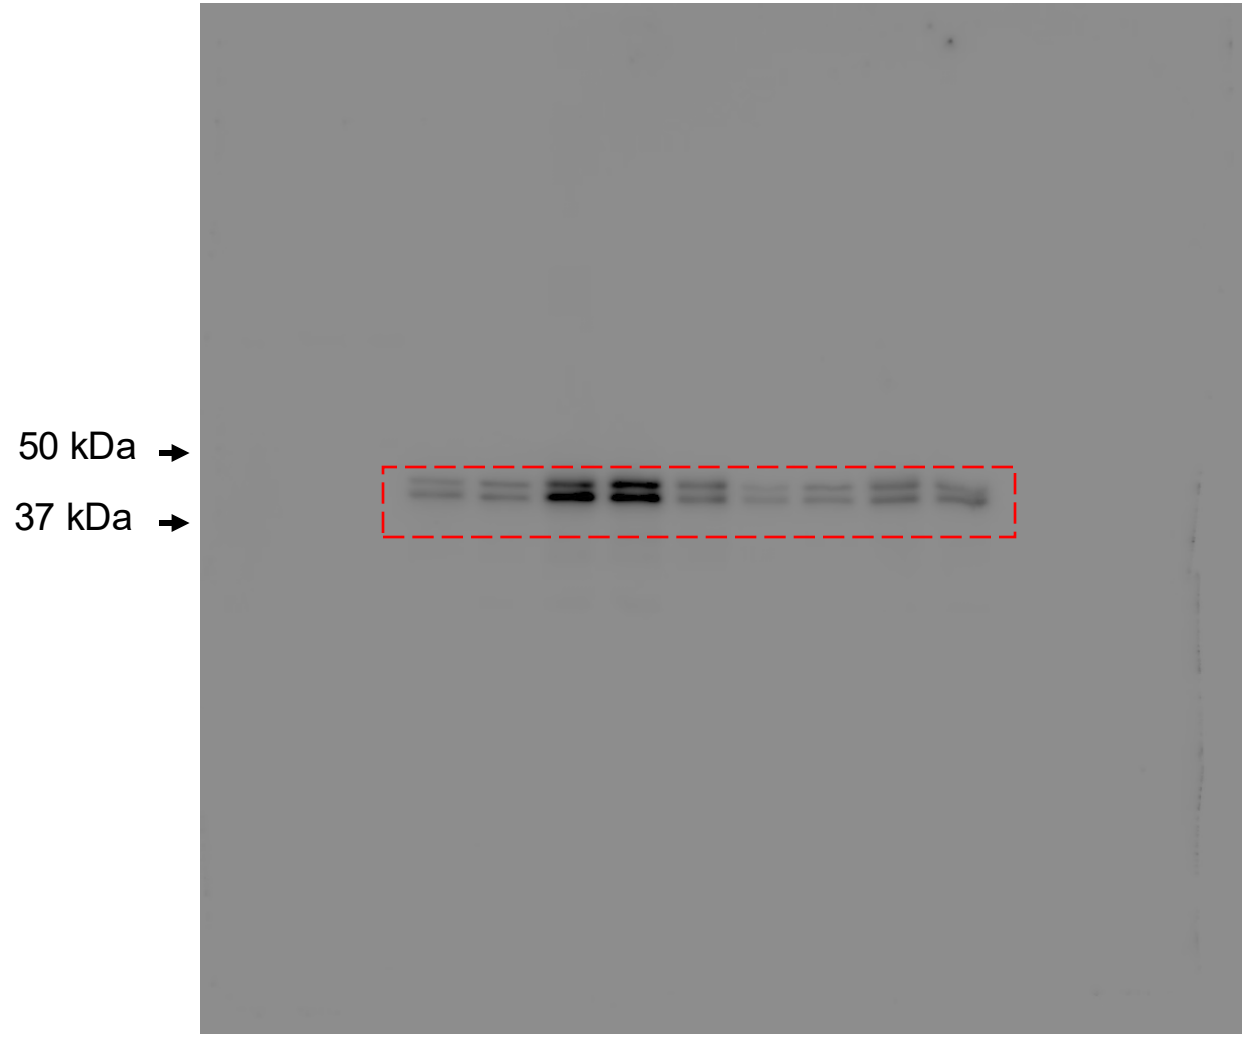

Full unedited membrane of pERK1/2 for Figure 7D. The result is presented in reverse left to right in Figure 7D.

LPL

250 kDa →  
150 kDa →  
100 kDa →  
75 kDa →  
50 kDa →  
37 kDa →  
25 kDa →  
20 kDa →  
15 kDa →

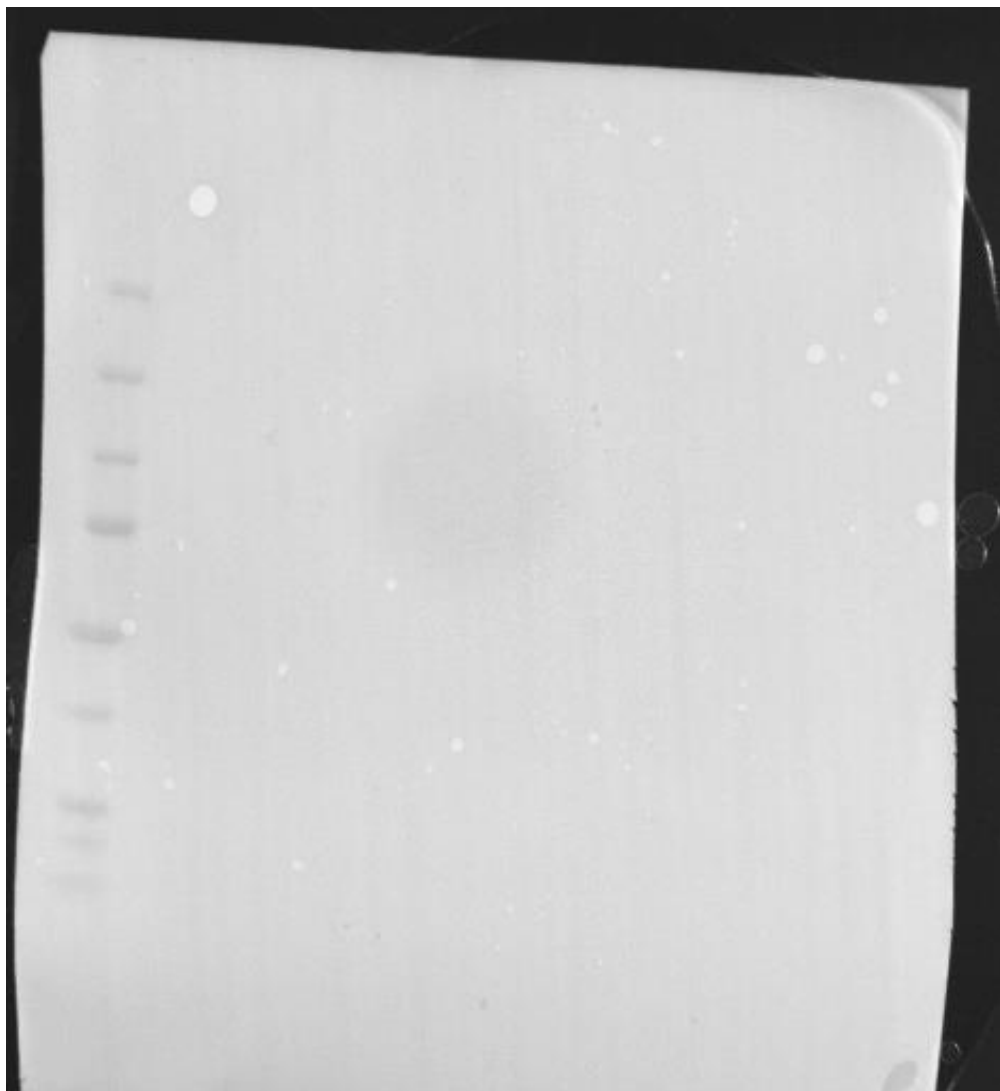

PF-04457845  
treated  
n = 5

Vehicle  
treated  
n = 4

50 kDa →

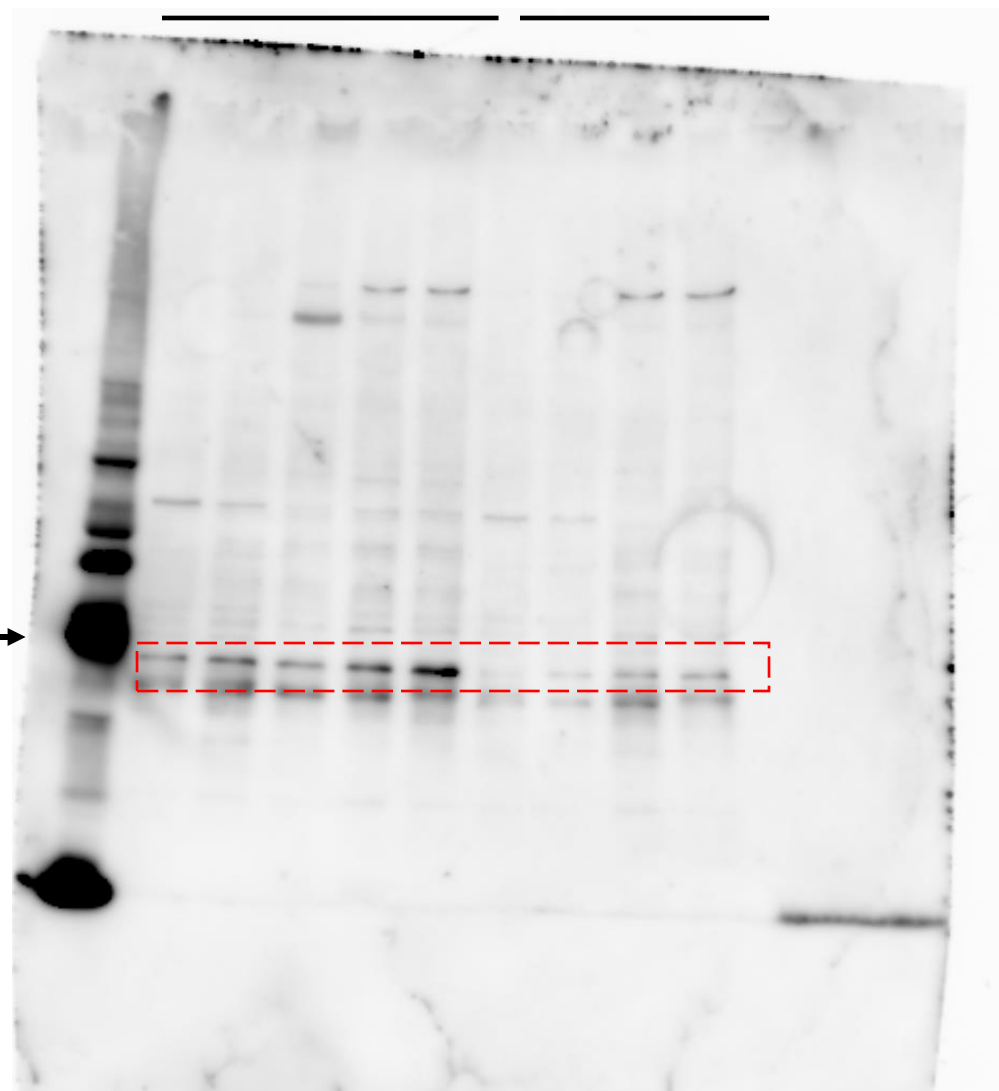

Full unedited membrane of LPL for Figure 7D. The result is presented in reverse left to right in Figure 7D.

# GAPDH

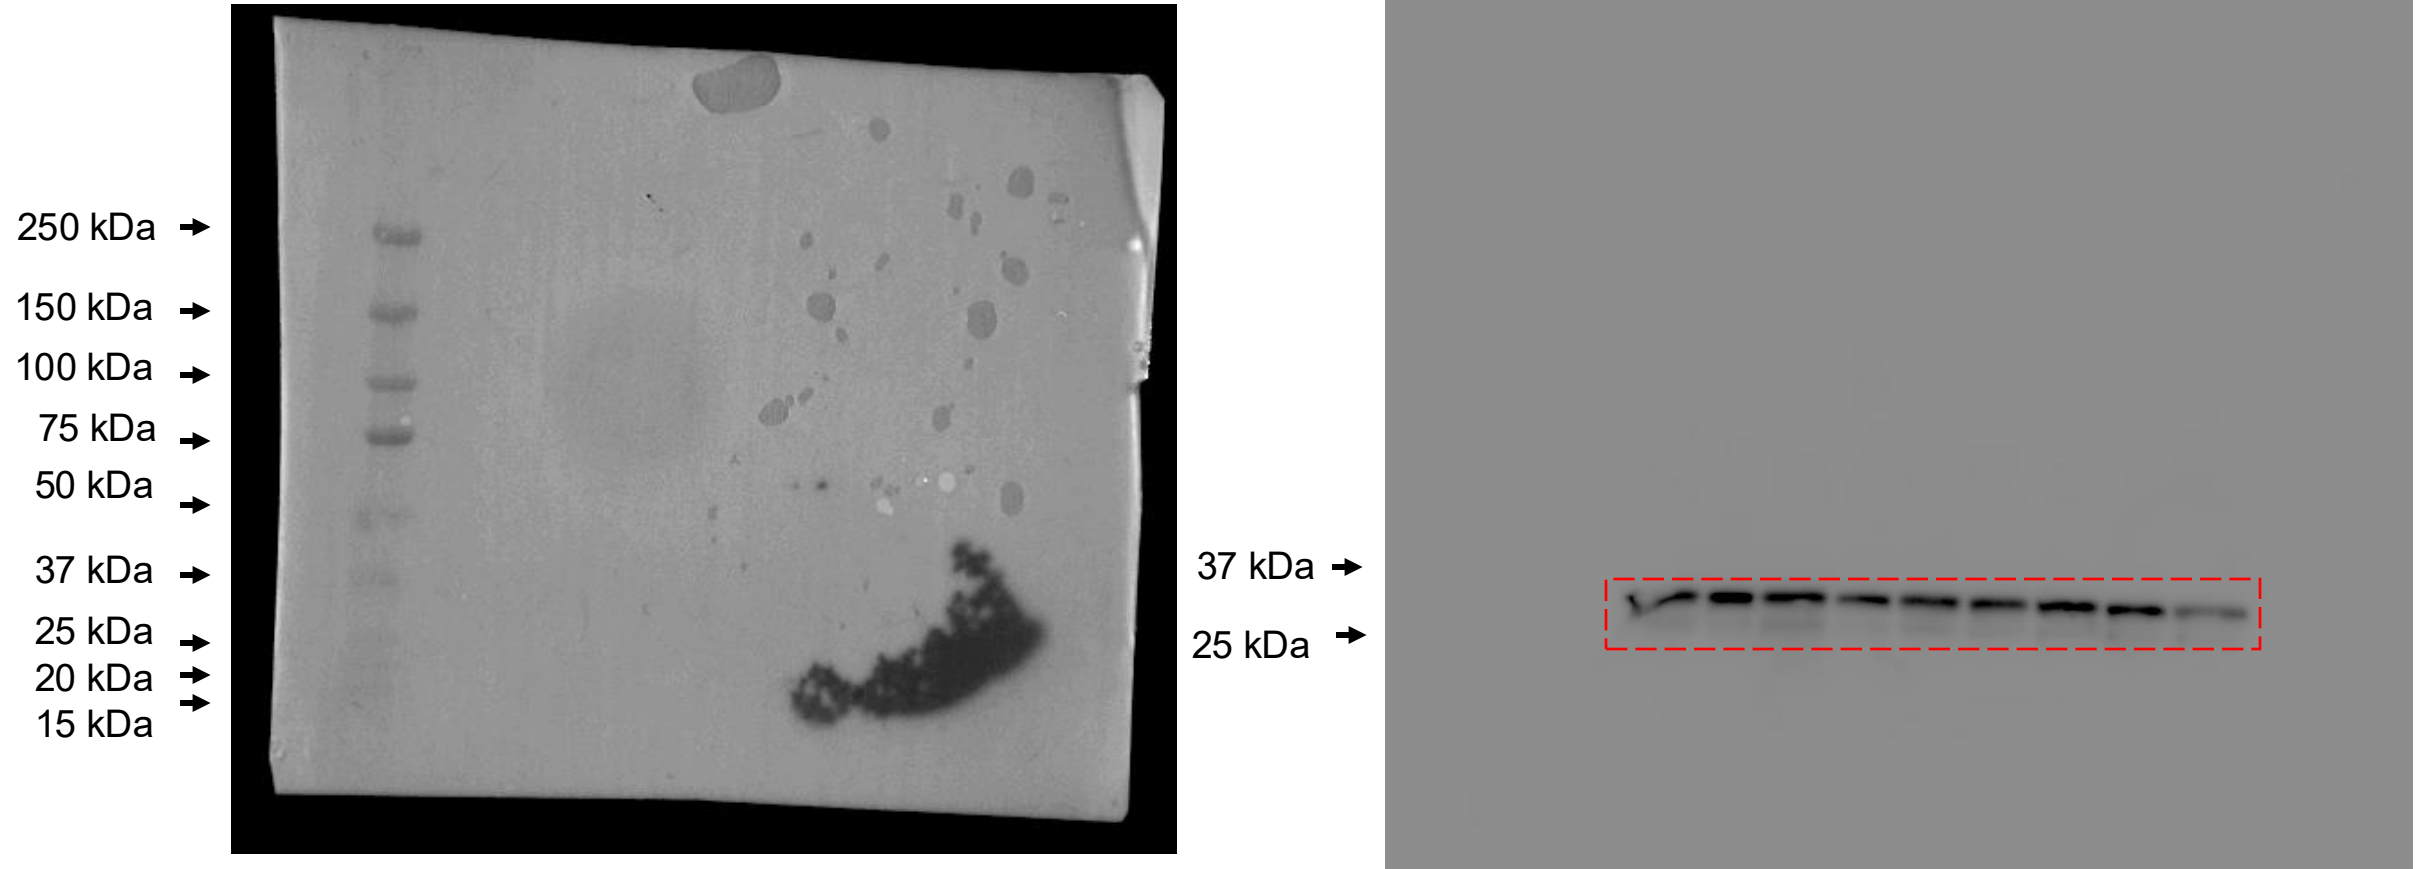

Full unedited membrane of GAPDH for Figure 7D. The result is presented in reverse left to right in Figure 7D.
